# Supplementary material
Source: HighWire-hosted journal article supplement (http://www.ajnr.org/highwire/filestream/87921/field_highwire_adjunct_files/0/20-00960.pdf)
Supplement: 20-00960.pdf [file 20-00960.pdf]

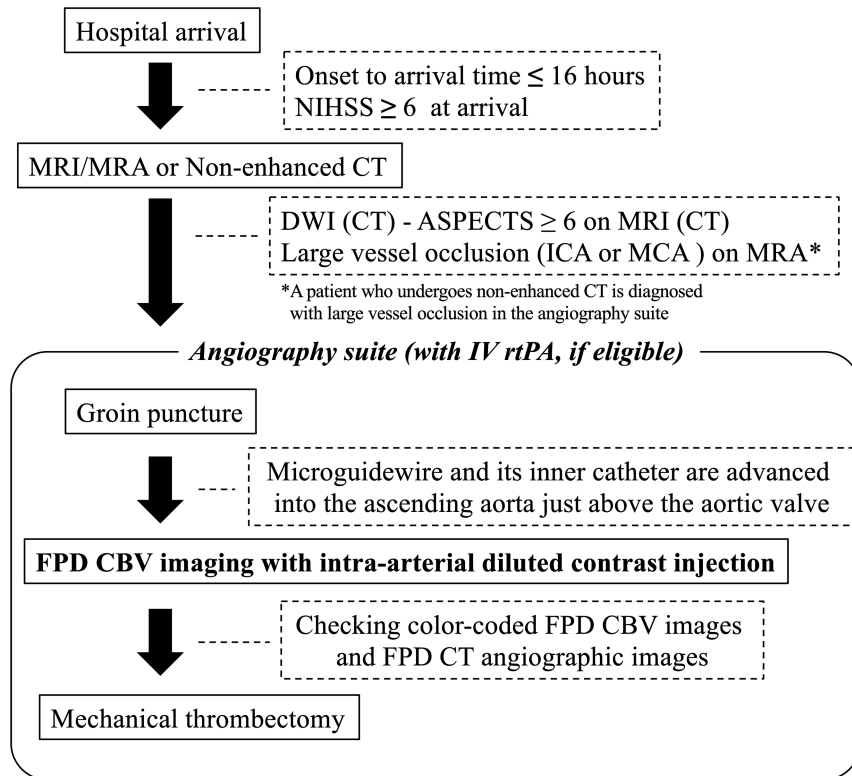

**ONLINE FIG 1.** MR imaging–based protocol for mechanical thrombectomy.

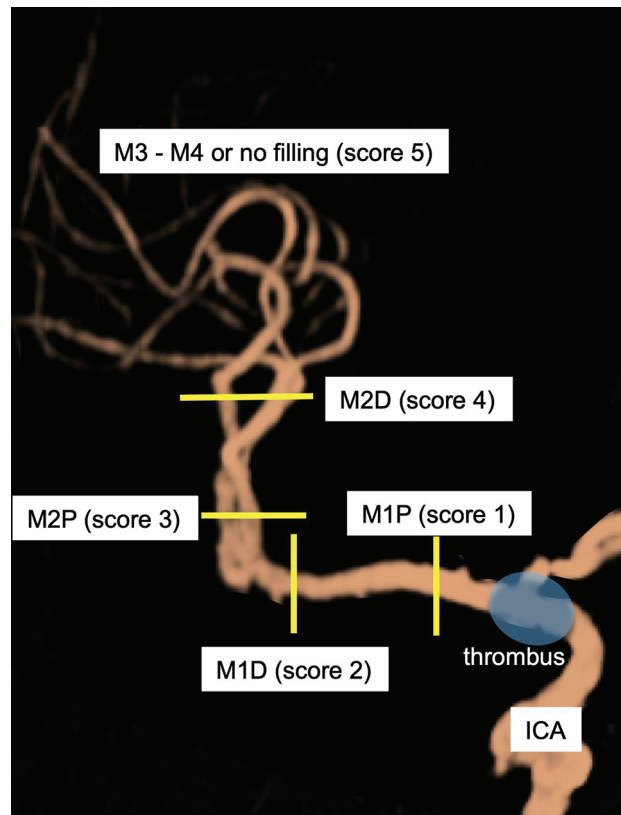

**ONLINE FIG 2.** Diagrammatic representation of assignment of the visualization score in the right ICA-T occlusion case. In ICA-T occlusion, if the M1 proximal segment is visualized, a score of 1 is assigned. Similarly, if the M1 distal, M2 proximal, or M2 distal segment is visualized, a score of 2, 3, or 4 is assigned, respectively. If MCA M3 and M4 segments are visualized or no significant visualization is found, a score of 5 is assigned.
